# Supplementary material for: Enhanced production of H2 under visible light via co-deposited Pt and Ir species on g-C3N4
Source: Royal Society of Chemistry journal article supplement (doi:10.1039/d0cy01321h), 2020-01-01
Supplement: d0cy01321h1.pdf [file d0cy01321h1.pdf]

Electronic Supplementary Information (ESI)

# Enhanced production of H<sub>2</sub> under visible light via a co-deposited Pt and Ir species on g-C<sub>3</sub>N<sub>4</sub>

Chen Chen<sup>a</sup>, Jianjun Zhao<sup>a</sup> and Yiming Xu<sup>a\*</sup>

<sup>a</sup> State Key Laboratory of Silicon Materials and Department of Chemistry, Zhejiang University, Hangzhou 310027, China.

\* To whom correspondence should be addressed. Email: [xuym@zju.edu.cn](mailto:xuym@zju.edu.cn)

## Content

|                                                                                                                                                                                       |     |
|---------------------------------------------------------------------------------------------------------------------------------------------------------------------------------------|-----|
| Experimental details for other catalyst synthesis.                                                                                                                                    | 2/5 |
| Table S1. XRD analysis of C <sub>3</sub> N <sub>4</sub> .                                                                                                                             |     |
| Figures S1 and S2. Tauc plots and N <sub>2</sub> adsorption isotherms.                                                                                                                | 3/5 |
| Figure S3. XPS spectra of IrO <sub>2</sub> /C <sub>3</sub> N <sub>4</sub> , Pt/C <sub>3</sub> N <sub>4</sub> , and an irradiated Pt/IrO <sub>2</sub> /C <sub>3</sub> N <sub>4</sub> . |     |
| Figure S4. HRTEM images of Pt/IrO <sub>2</sub> /C <sub>3</sub> N <sub>4</sub> .                                                                                                       | 4/5 |
| Figure S5. Solid characterization of H-C <sub>3</sub> N <sub>4</sub> and Pt/H-C <sub>3</sub> N <sub>4</sub> .                                                                         |     |
| Figure S6. H <sub>2</sub> evolution on other catalysts, and effect of methanol and TEOA.                                                                                              |     |
| Figures S7–S9. Tafel plots and photocurrent changes for Figure 4.                                                                                                                     | 5/5 |
| Figure S10. Mott–Schottky plots for different catalysts                                                                                                                               |     |

## Experimental for synthesis of other catalysts

**H-C<sub>3</sub>N<sub>4</sub> and Pt/H-C<sub>3</sub>N<sub>4</sub>.** First, 300 mg g-C<sub>3</sub>N<sub>4</sub> was transferred into a crucible, and heated at 400 °C for 4 h (10 °C·min<sup>-1</sup>). Except IrCl<sub>4</sub> solution not added, this procedure was the same as that used for IrO<sub>2</sub>/C<sub>3</sub>N<sub>4</sub> synthesis. The resulting samples are devoted as H-C<sub>3</sub>N<sub>4</sub>. Second, Pt/H-C<sub>3</sub>N<sub>4</sub> was prepared from H-C<sub>3</sub>N<sub>4</sub>, under the same conditions used for 0.5Pt/C<sub>3</sub>N<sub>4</sub> synthesis

**MoS<sub>2</sub>/C<sub>3</sub>N<sub>4</sub>.** First, MoS<sub>2</sub> was synthesized by following previous report. Sodium molybdate (0.726 g, 3.0 mmol) and thioacetamide (1.2 g, 16 mmol) were dissolved in 80 mL of distilled water. After stirring for 1 h, the mixture was transferred to a 100 mL Teflon liner, sealed in the stainless-steel autoclave and heated at 210 °C for 24 h. After collection, the products were collected and washed with de-ionized water for several times and dried at 60 °C. Second, 300 mg g-C<sub>3</sub>N<sub>4</sub> was suspended in 40 mL of absolute ethanol and subjected to ultra-sonication for 30 min. To the suspension, MoS<sub>2</sub> dispersion (1.5 mL, 1 mg/mL) was slowly added under ultra-sonication. After stirring for 1 h. the product was filtered, washed, and dried at 60 °C. This sample is denoted as MoS<sub>2</sub>/C<sub>3</sub>N<sub>4</sub>.

**NiS/C<sub>3</sub>N<sub>4</sub>.** It was prepared by direct precipitation method. First, 300 mg g-C<sub>3</sub>N<sub>4</sub> was dispersed in 60 mL water by ultrasound. Second, 600 μ L 0.027 M Ni(NO<sub>3</sub>)<sub>2</sub> solution was dropped into the dispersion,. After stirring for 30 min, 600 μ L 0.027 M Na<sub>2</sub>S solution was dropped into the above mixed solution. After 1 h stirring, the samples were filtered, rinsed with distilled water, and dried at 60 °C and denoted as NiS/C<sub>3</sub>N<sub>4</sub>.

**Table S1** X-ray diffraction pattern analysis for samples<sup>a</sup>

| Samples                                            | Peak 100 |        |                         |                        |       |                     | Peak 002 |        |                         |                        |       |                     |
|----------------------------------------------------|----------|--------|-------------------------|------------------------|-------|---------------------|----------|--------|-------------------------|------------------------|-------|---------------------|
|                                                    | 2θ(°)    | d (nm) | Area (10 <sup>4</sup> ) | Int (10 <sup>4</sup> ) | W (°) | d <sub>s</sub> (nm) | 2θ(°)    | d (nm) | Area (10 <sup>5</sup> ) | Int (10 <sup>5</sup> ) | W (°) | d <sub>s</sub> (nm) |
| g-C <sub>3</sub> N <sub>4</sub>                    | 12.90    | 0.686  | 7.01                    | 3.83                   | 1.48  | 6.1                 | 27.50    | 0.325  | 4.66                    | 3.53                   | 1.02  | 20.6                |
| Pt/C <sub>3</sub> N <sub>4</sub>                   | 12.86    | 0.688  | 5.96                    | 3.17                   | 1.60  | 5.6                 | 27.44    | 0.325  | 4.01                    | 3.09                   | 1.02  | 19.2                |
| IrO <sub>2</sub> /C <sub>3</sub> N <sub>4</sub>    | 12.84    | 0.689  | 5.77                    | 2.88                   | 1.82  | 4.9                 | 27.54    | 0.324  | 4.06                    | 3.08                   | 1.02  | 21.7                |
| Pt/IrO <sub>2</sub> /C <sub>3</sub> N <sub>4</sub> | 12.84    | 0.689  | 6.28                    | 3.27                   | 1.74  | 5.1                 | 27.54    | 0.324  | 4.24                    | 3.21                   | 1.00  | 22.1                |

<sup>a</sup>d, repeat distance; Int; peak intensity; W, peak width; d<sub>s</sub>, crystallite size estimated with the Scherrer equation.

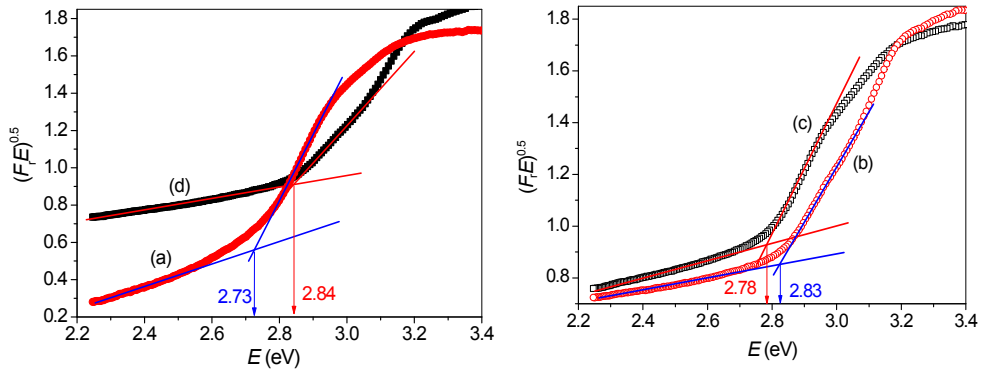

**Fig. S1** Tauc plots for indirect transition, obtained from (a) g-C<sub>3</sub>N<sub>4</sub>, (b) IrO<sub>2</sub>/C<sub>3</sub>N<sub>4</sub>, (c) Pt/C<sub>3</sub>N<sub>4</sub>, and (d) Pt/IrO<sub>2</sub>/C<sub>3</sub>N<sub>4</sub>. Note that  $E$  is light energy, and  $F_r$  is Kubelka-Munk unit,  $F_r = (1 - R)^2 / (2R)$ , where  $R$  is reflectance.

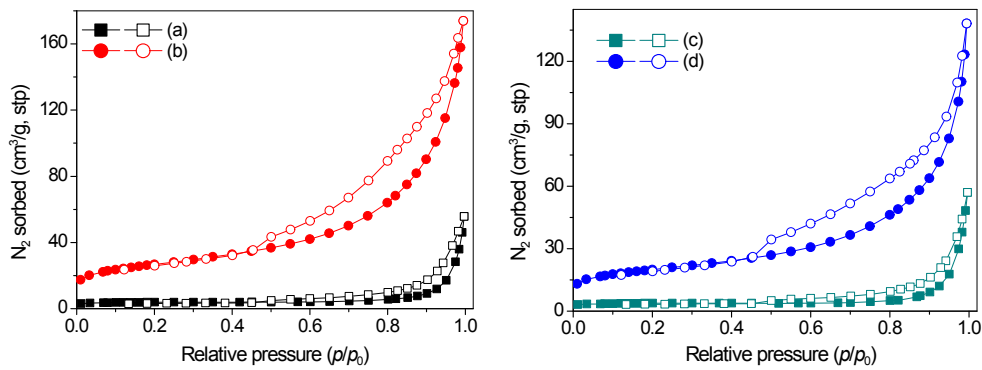

**Fig. S2** Isotherms of N<sub>2</sub> adsorption (solid symbols) and desorption (open symbols) on the samples of (a) g-C<sub>3</sub>N<sub>4</sub>, (b) IrO<sub>2</sub>/C<sub>3</sub>N<sub>4</sub>, (c) Pt/C<sub>3</sub>N<sub>4</sub> and (d) Pt/IrO<sub>2</sub>/C<sub>3</sub>N<sub>4</sub>.

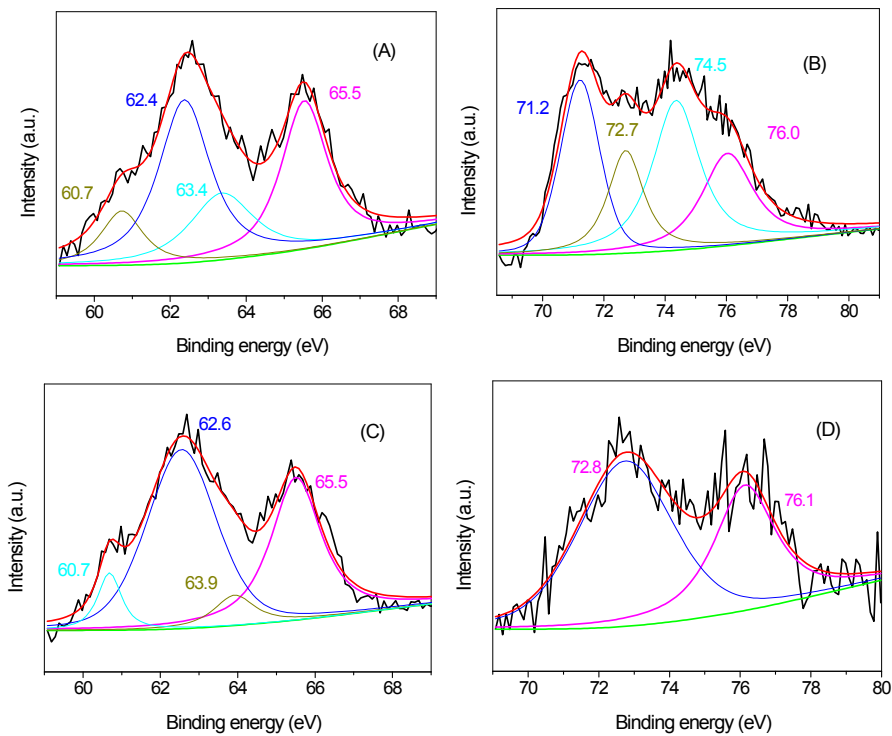

**Fig. S3** XPS spectra for (A) Ir 4f in IrO<sub>2</sub>/C<sub>3</sub>N<sub>4</sub>, and (B) Pt 4f in Pt/C<sub>3</sub>N<sub>4</sub>. (C) Ir 4f, and (D) Pt 4f, recorded with Pt/IrO<sub>2</sub>/C<sub>3</sub>N<sub>4</sub> after repeat experiments.

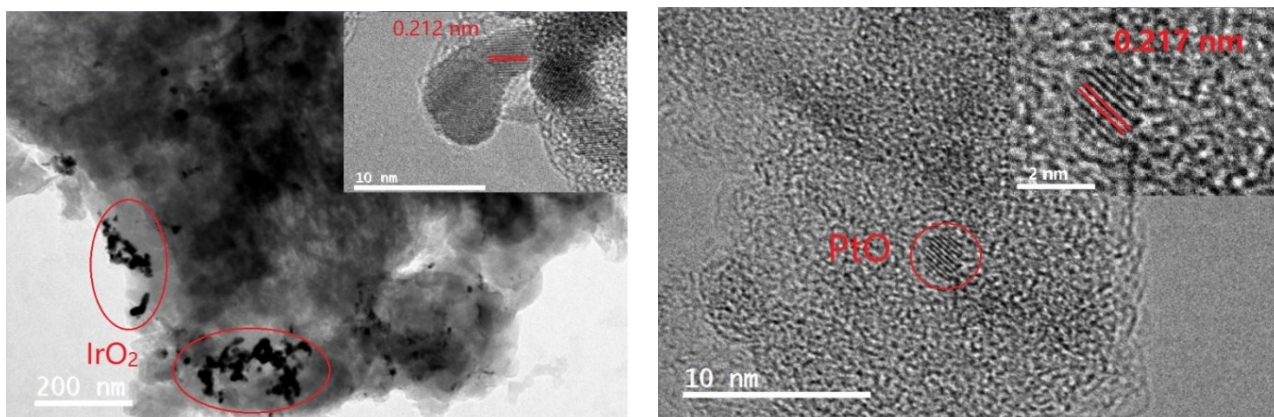

**Fig. S4** HRTEM images of Pt/IrO<sub>2</sub>/C<sub>3</sub>N<sub>4</sub> for IrO<sub>2</sub> and PtO.

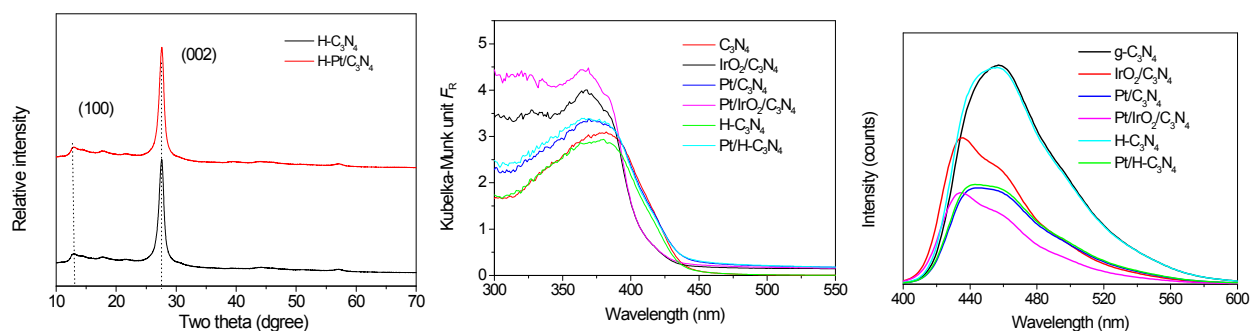

**Fig. S5** XRD, absorption, and photoluminescence spectra of the solids indicated by the legends.

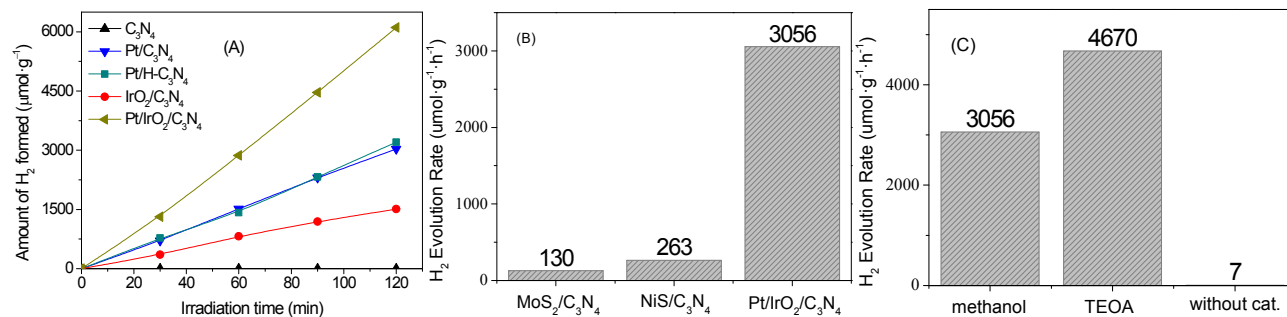

**Fig. S6** H<sub>2</sub> evolution for (A) Pt/H-C<sub>3</sub>N<sub>4</sub>, (B) MoS<sub>2</sub>/C<sub>3</sub>N<sub>4</sub>, and NiS/C<sub>3</sub>N<sub>4</sub>, and (C) Pt/IrO<sub>2</sub>/C<sub>3</sub>N<sub>4</sub> in presence of TEOA.

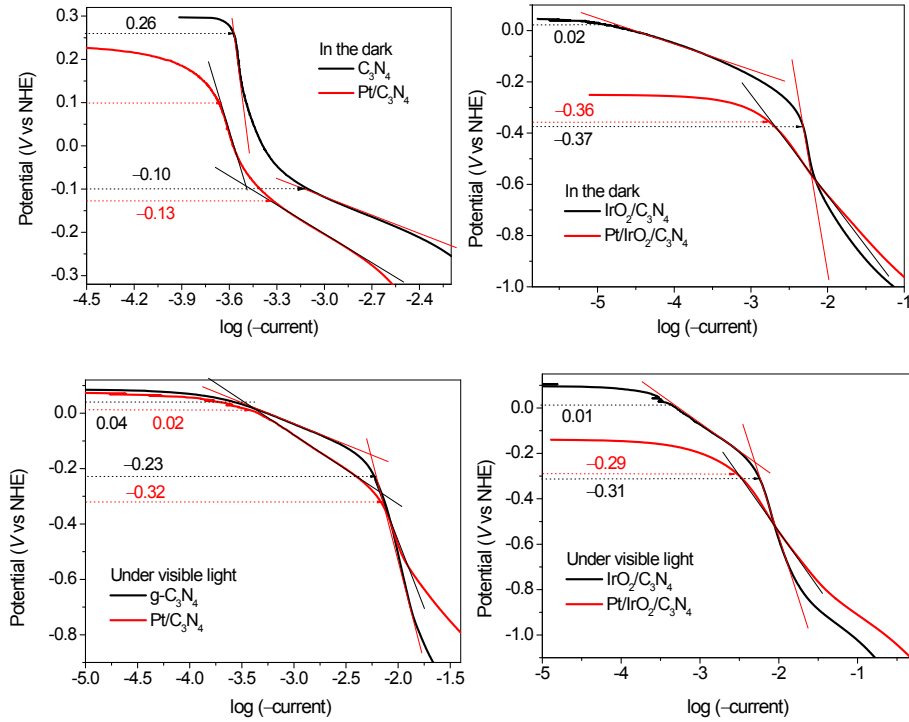

**Fig. S7** Curve fitting to Fig. 4A for proton reduction on the electrodes, as shown by the legends.

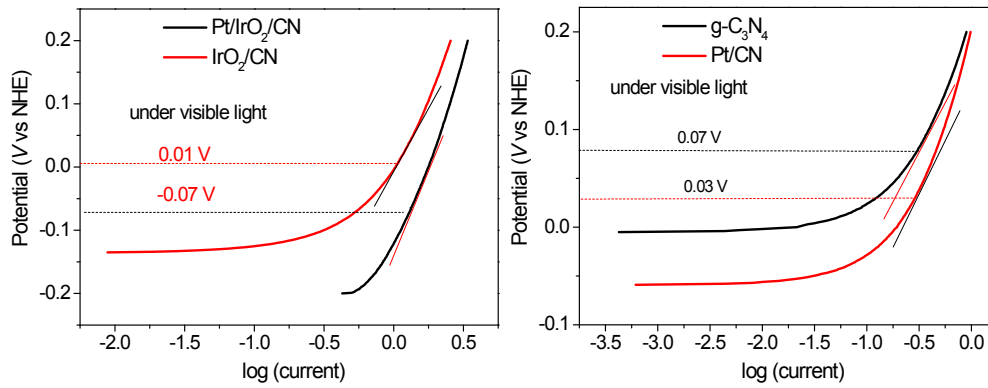

**Fig. S8** Curve fitting to Fig. 4B for water oxidation on the electrodes, as shown by the legends.

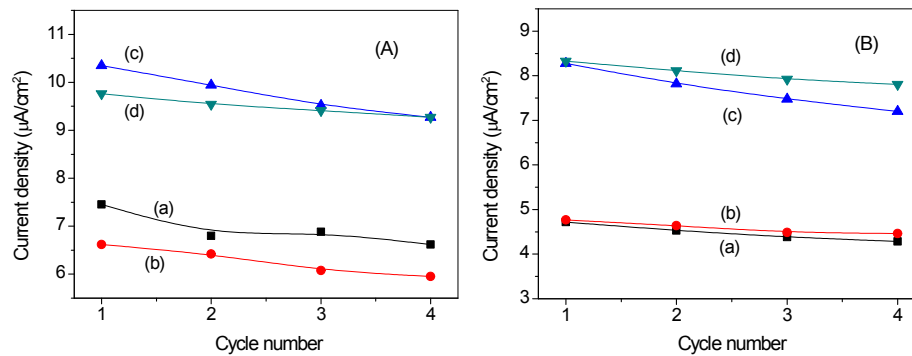

**Fig. S9** (A) Maximum photocurrent, and (B) steady photocurrent for Fig. 4C in the text.

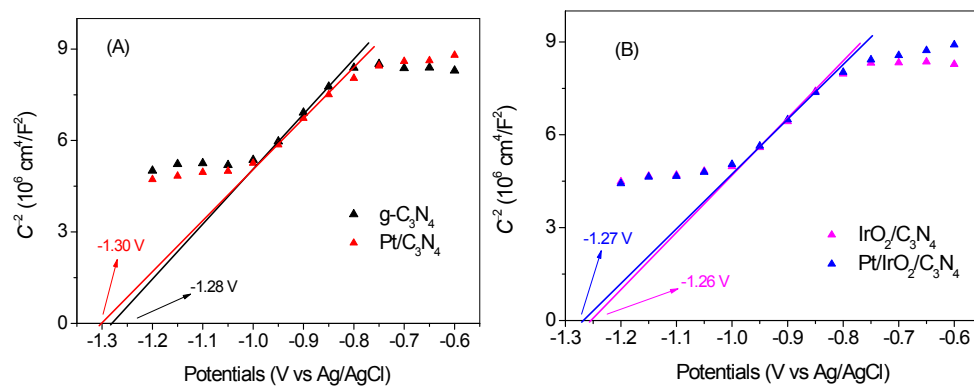

**Fig. S10** Mott–Schottky plots for a film electrode of samples, measured in 0.5 M  $\text{NaClO}_4$  in the dark and under  $\text{N}_2$ , as shown by the legends.
